# Supplementary material for: Air Quality and Comfort Characterisation within an Electric Vehicle Cabin in Heating and Cooling Operations
Source: MDPI journal article supplement (doi:10.3390/s22020543), 2022-01-11
Supplement: s1 [file s1]

Article

# Air Quality and Comfort Characterisation within an Electric Vehicle Cabin in Heating and Cooling Operations <sup>†</sup>

Luigi Russi <sup>1,\*</sup>, Paolo Guidorzi <sup>1</sup>, Beatrice Pulvirenti <sup>1</sup>, Davide Aguiari <sup>2</sup>, Giovanni Pau <sup>2,3</sup> and Giovanni Semprini <sup>1</sup>

<sup>1</sup> Department of Industrial Engineering, Alma Mater Studiorum, University of Bologna, 40136 Bologna, Italy; paolo.guidorzi@unibo.it (P.G.); beatrice.pulvirenti@unibo.it (B.P.); giovanni.semprini@unibo.it (G.S.)

<sup>2</sup> Department of Computer Science and Engineering, Alma Mater Studiorum, University of Bologna, 40136 Bologna, Italy; davide.aguiari2@unibo.it (D.A.); giovanni.pau@unibo.it (G.P.)

<sup>3</sup> UCLA Samueli Computer Science, University of California, Los Angeles, CA 90024, USA

\* Correspondence: luigi.russi@unibo.it

<sup>†</sup> This paper is an extended version of Russi, L.; Guidorzi, P.; Pulvirenti, B.; Semprini, G.; Aguiari, D.; Pau, G. Air quality and comfort characterisation within an electric vehicle cabin. In Proceedings of the 2021 IEEE International Workshop on Metrology for Automotive (MetroAutomotive), Bologna, Italy, 1–2 July 2021; pp. 169–174.

<sup>‡</sup> Current address: Viale del Risorgimento 2, 40136 Bologna, Italy.

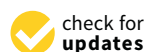

**Citation:** Russi, L.; Guidorzi, P.; Pulvirenti, B.; Aguiari, D.; Pau, G.; Semprini, G. Air Quality and Comfort Characterisation within an Electric Vehicle Cabin in Heating and Cooling Operations. *Sensors* **2022**, *1*, 0. <https://doi.org/>

Academic Editor: Aritra Ghosh

Received: 18 November 2021

Accepted: 28 December 2021

Published:

**Publisher's Note:** MDPI stays neutral with regard to jurisdictional claims in published maps and institutional affiliations.

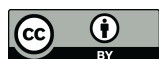

**Copyright:** © 2021 by the authors. Licensee MDPI, Basel, Switzerland. This article is an open access article distributed under the terms and conditions of the Creative Commons Attribution (CC BY) license (<https://creativecommons.org/licenses/by/4.0/>).

## 1. High Spatial Resolution Analysis of Cabin Air Temperature Profile

### 1.1. Heating Operation

#### 1.1.1. Fresh-Air Configuration

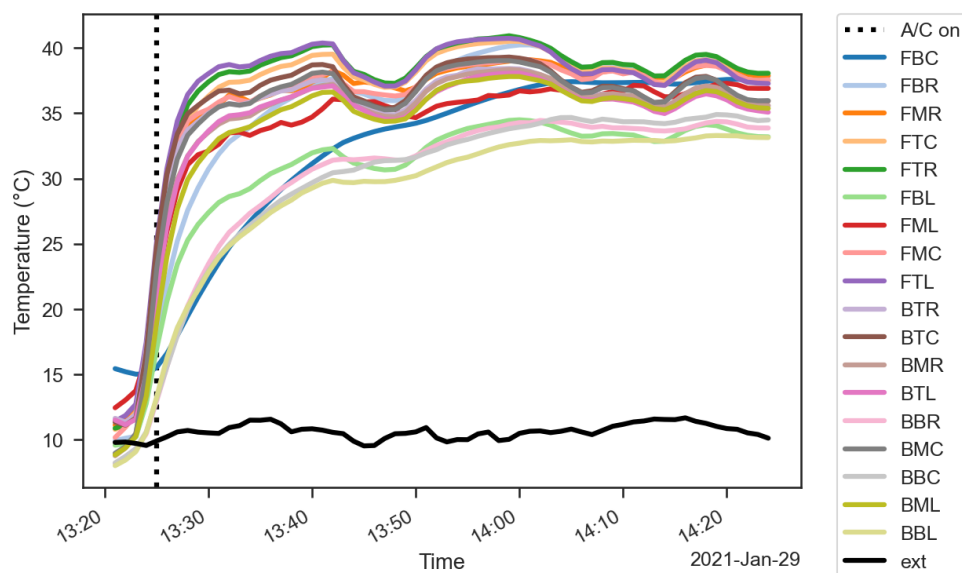

**Figure 1.** Heating temperature profiles, fresh-air mode.

Figure 1 shows the readings from all the 18 temperature sensors in the cabin for the case with fresh-air mode with a 3 letters naming scheme [1]:

1. The first letter tells us if we are in the front (F) or in the back (B) of the cabin.
2. The second letter refers to the location in vertical direction, namely bottom (B), middle (M) and top (T) plane.
3. The third letter refers to the location in the horizontal direction, namely left (L) or driver, center (C) or right (R) side.

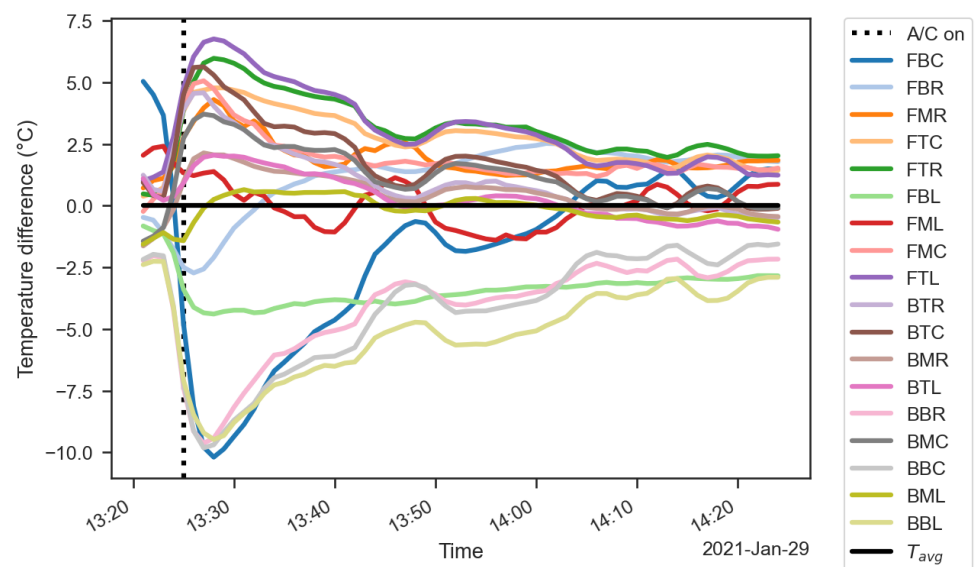

**Figure 2.** Heating temperature difference profiles, fresh-air mode.

Colder spots can be found at feet level of the back seats, moreover this is in disagreement with the studies of Nilsson on equivalent temperature of body segments [2]. In other words, analysing the results of the work that led to the development of the only available standard for comfort evaluation in vehicles (ISO-14505), we can infer that occupants will be likely to accept colder temperatures in upper body parts during winter, while here we are in the opposite situation. Data from position FBC have a different behaviour because it refers to the sensor installed inside the acquisition system box, thus suffering from thermal inertia issues.

Defining a temperature difference  $\Delta t = t_i - t_{avg}$ , where  $t_i$  is the temperature in one generic position of the grid, and  $t_{avg}$  the mean value of the 18 temperature readings for each timestamp; it is possible to obtain Figure 2. It is worth noting that air temperature inside the cabin can reach discrepancies of more than 15 °C in the first minutes of operation, while the  $\Delta t$  values at the end of test is lower and the temperature distribution much more uniform.

#### 1.1.2. Recirculation Configuration

Figure 3 shows the readings from all the 18 temperature sensors in the cabin for the case with recirculation mode. Air temperature inside the cabin shows slightly higher discrepancies with respect to the previous case, while colder spots can be found again at feet level of the back seats. The signal from the FBC sensor shows similar responsiveness issues as for the case without recirculation. Higher temperature gradients in the startup phase are evident from Figure 4, while a smoother profile is reached at the end of the test.

### 1.2. Cooling Operation

#### 1.2.1. Fresh-Air Configuration

All the experiments confirm that the cooling system is not capable of reaching a quasi-steady state condition in about 60 min, texti.e. the temperature reached by the air inside the cabin is far from the set-point temperature value. Figure 5 shows the readings from all the 18 temperature sensors in the cabin for the case with fresh-air mode with the same naming scheme introduced in the previous section.

Temperature discrepancies in the cabin can approach 12 °C; warmer spots can be found at top and middle locations, while the bottom zone is generally colder (Fig. 6). To a certain extent, this is in agreement with a stratification of cabin air during operation, despite the vents working at full power. Looking at "light summer" comfort zones defined

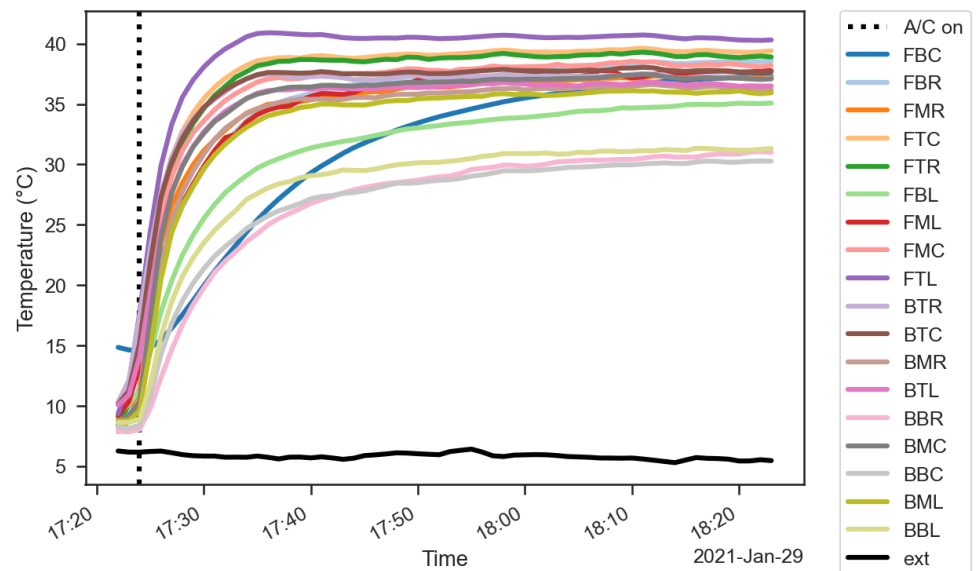

Figure 3. Heating temperature profiles, recirculation mode.

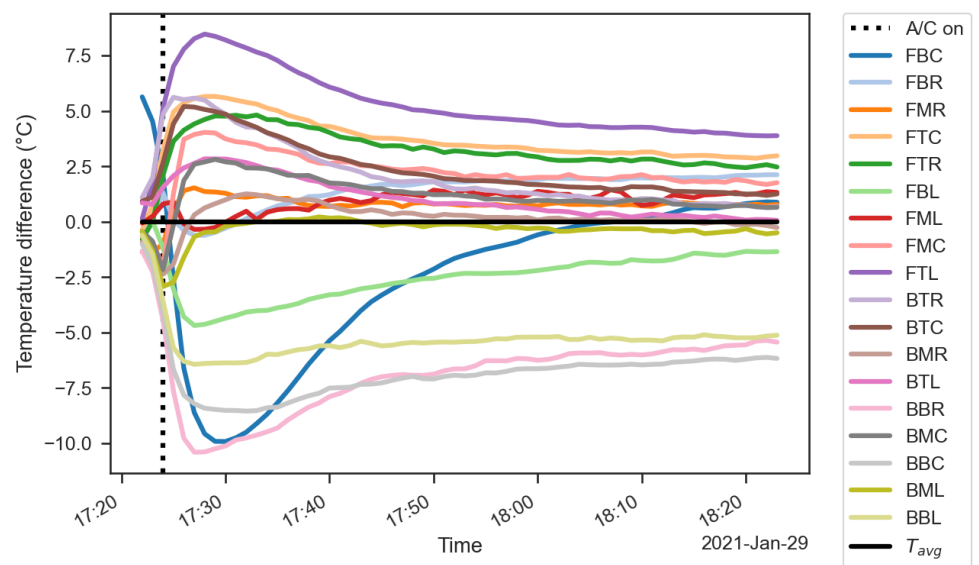

Figure 4. Heating temperature difference profiles, recirculation mode.

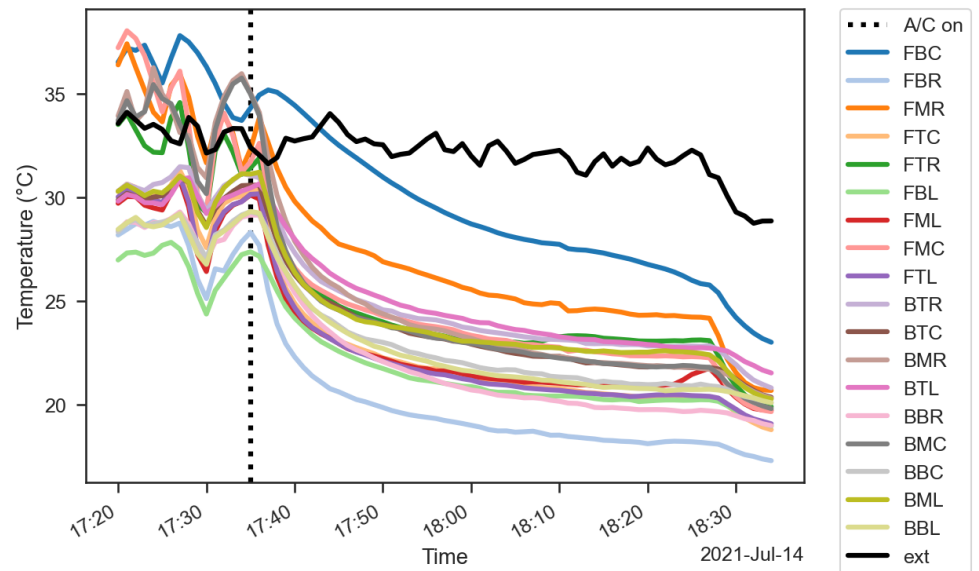

Figure 5. Cooling temperature profiles, fresh-air mode.

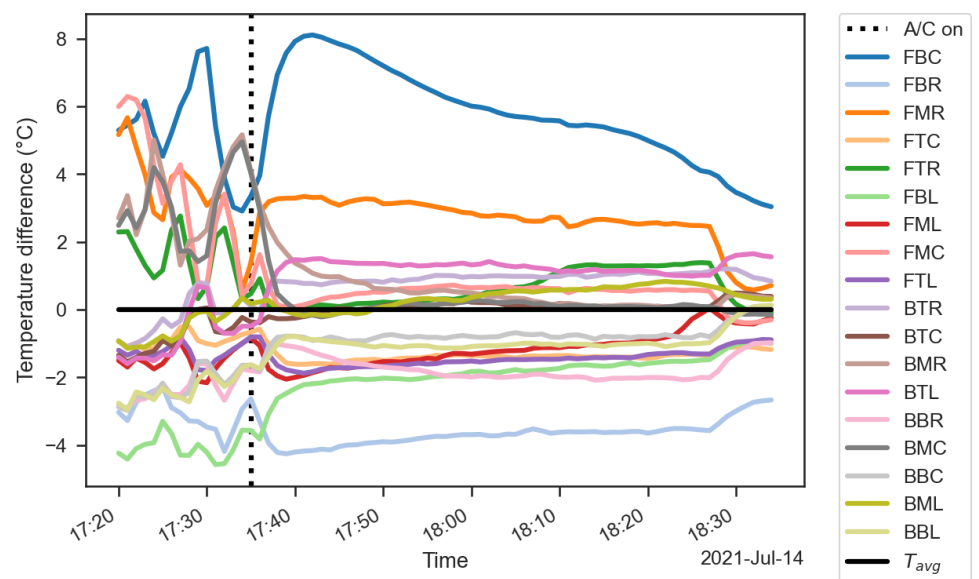

Figure 6. Cooling temperature difference profiles, fresh-air mode.

by [2], we can infer that occupants will be likely to accept warmer temperatures in lower body parts during summer, while this result goes in the opposite direction. Self heating and thermal inertia issue of the sensor positioned at the FBC position are still evident.

### 1.2.2. Recirculation Configuration

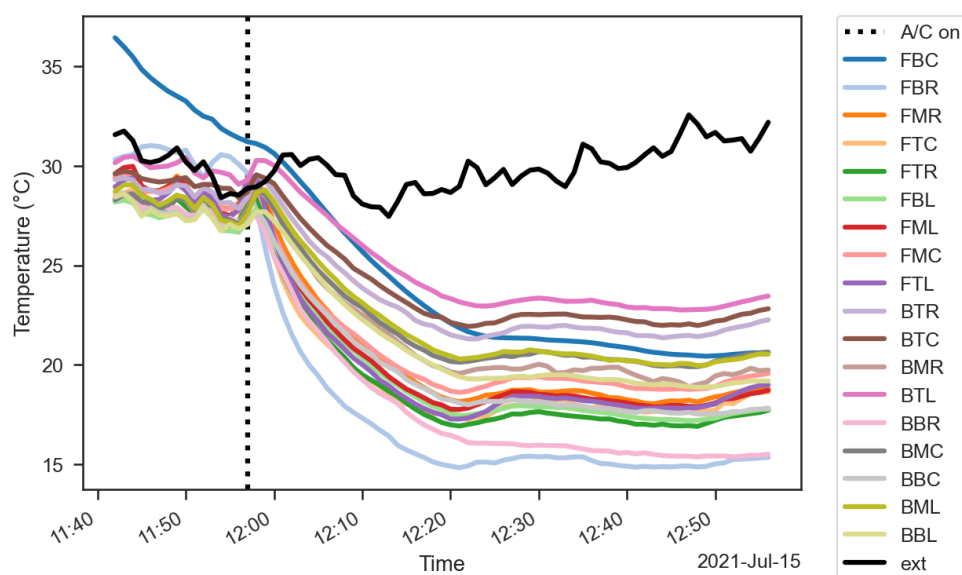

**Figure 7.** Cooling temperature profiles, recirculation mode.

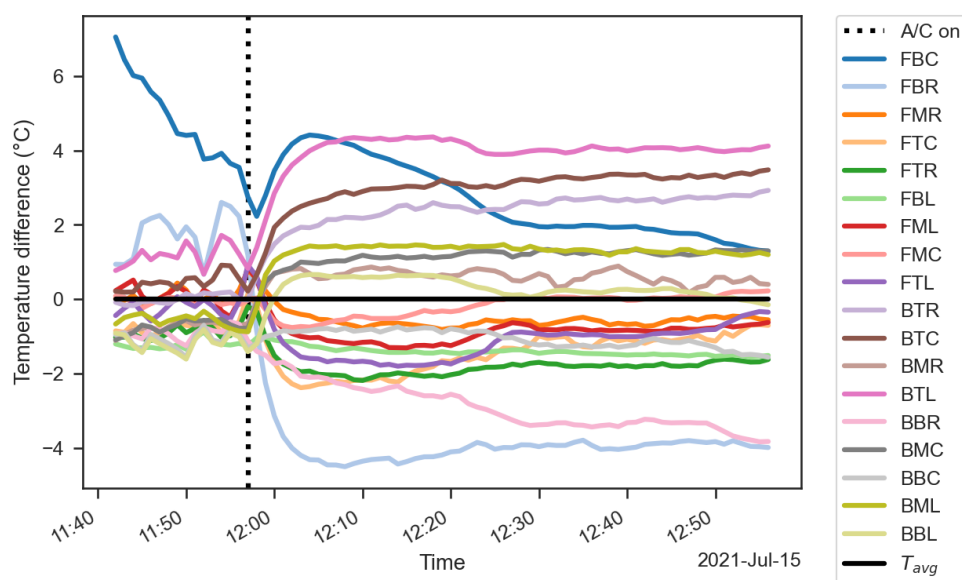

**Figure 8.** Cooling temperature difference profiles, recirculation mode.

Figures 7 and 8 show the readings from all the 18 temperature sensors in the cabin for the case with recirculation mode. Air temperature stratification with respect to the vertical axis is again considerable; colder spots can be found at feet level of the back seats. The main difference with the fresh air case is that the bottom right location is well capable of reaching the set-point temperature.

### Abbreviations

The following abbreviations are used in this document:

---

|     |                     |
|-----|---------------------|
| FTL | Front Top Left      |
| FTC | Front Top Center    |
| FTR | Front Top Right     |
| FML | Front Middle Left   |
| FMC | Front Middle Center |
| FMR | Front Middle Right  |
| FBL | Front Bottom Left   |
| FBC | Front Bottom Center |
| FBR | Front Bottom Right  |
| BTL | Back Top Left       |
| BTC | Back Top Center     |
| BTR | Back Top Right      |
| BML | Back Middle Left    |
| BMC | Back Middle Center  |
| BMR | Back Middle Right   |
| BBL | Back Bottom Left    |
| BBC | Back Bottom Center  |
| BBR | Back Bottom Right   |

## References

1. Russi, L.; Guidorzi, P.; Pulvirenti, B.; Semprini, G.; Aguiari, D.; Pau, G. Air quality and comfort characterisation within an electric vehicle cabin. In Proceedings of the 2021 IEEE International Workshop on Metrology for Automotive (MetroAutomotive), Bologna, Italy, 1–2 July 2021; pp. 169–174. <https://doi.org/10.1109/MetroAutomotive50197.2021.9502853>.
2. Nilsson, H. Comfort Climate Evaluation with Thermal Manikin Methods and Computer Simulation Models. Ph.D. Thesis, Bygghvetenskap, Stockholm, Sweden, 2004.
