# Supplementary figures and images for: Air Quality and Comfort Characterisation within an Electric Vehicle Cabin in Heating and Cooling Operations
Source: MDPI journal article supplement (doi:10.3390/s22020543), 2022-01-11

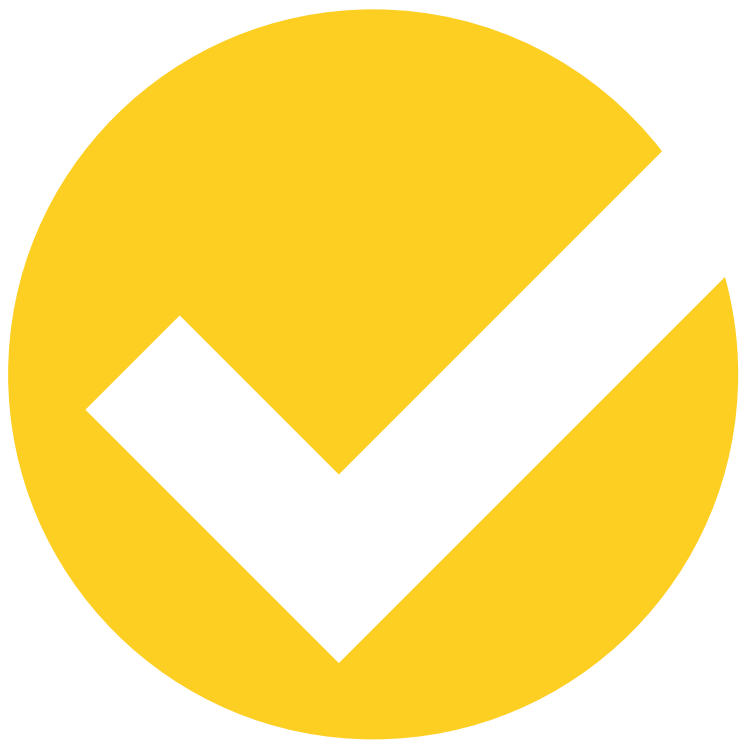

check for  
updates

Supplement: s1 [file s1]

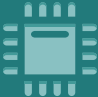

*sensors*

Supplement: s1 [file s1]

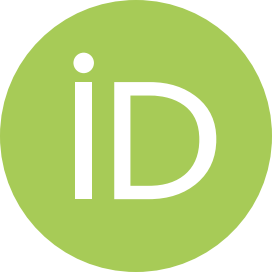

Supplement: s1 [file s1]

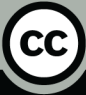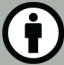

BY

Supplement: s1 [file s1]
